# Supplementary material for: Steatotic Liver Disease and Sepsis Outcomes—A Prospective Cohort Study (SepsisFAT)
Source: MDPI journal article supplement (doi:10.3390/jcm13030798), 2024-01-30
Supplement: s1 [file s1]

**Supplementary Table S1. Etiology of sepsis**

|                                                           | <b>NAFLD (%)</b> | <b>non-NAFLD (%)</b> |
|-----------------------------------------------------------|------------------|----------------------|
| <b>Positive blood cultures (Gram stain)</b>               | 50 (28.74%)      | 54 (26.47%)          |
| <i>Escherichia coli</i> (G-)                              | 11 (22.00%)      | 13 (24.07%)          |
| methicillin-susceptible <i>Staphylococcus aureus</i> (G+) | 8 (16.00%)       | 7 (12.96%)           |
| <i>Streptococcus pneumoniae</i> (G+)                      | 6 (12.00%)       | 9 (16.67%)           |
| group A $\beta$ -hemolytic streptococci (G+)              | 4 (8.00%)        | 5 (9.26%)            |
| group B $\beta$ -hemolytic streptococci (G+)              | 3 (6.00%)        | 0 (0.00%)            |
| <i>Streptococcus</i> spp. (G+)                            | 3 (6.00%)        | 2 (3.70%)            |
| <i>Klebsiella pneumoniae</i> (G-)                         | 3 (6.00%)        | 3 (5.56%)            |
| <i>Listeria monocytogenes</i> (G+)                        | 2 (4.00%)        | 1 (1.85%)            |
| <i>Pseudomonas aeruginosa</i> (G-)                        | 2 (4.00%)        | 2 (3.70%)            |
| <i>Salmonella</i> spp. (G-)                               | 2 (4.00%)        | 2 (3.70%)            |
| <i>Bacteroides</i> spp. (G-)                              | 2 (4.00%)        | 1 (1.85%)            |
| <i>Fusobacterium nucleatum</i> (G-)                       | 1 (2.00%)        | 2 (3.70%)            |
| <i>Enterococcus</i> spp. (G+)                             | 1 (2.00%)        | 3 (5.56%)            |
| <i>Kingella kingae</i> (G-)                               | 1 (2.00%)        | 0 (0.00%)            |
| <i>Enterobacter</i> spp. (G-)                             | 1 (2.00%)        | 2 (3.70%)            |
| <i>Citrobacter</i> spp. (G-)                              | 0 (0.00%)        | 2 (3.70%)            |
|                                                           |                  |                      |
| <b>Positive urine cultures</b>                            | 38 (21.84%)      | 55 (26.96%)          |
| <b>Positive stool cultures</b>                            | 21 (12.07%)      | 23 (11.27%)          |
| <b>Positive respiratory cultures</b>                      | 12 (6.90%)       | 12 (5.88%)           |
| <b>Other</b>                                              | 23 (13.22%)      | 32 (15.69%)          |
|                                                           |                  |                      |
| <b>Etiology unidentified</b>                              | 88 (50.57%)      | 86 (42.16%)          |
| <b>Etiology identified</b>                                | 86 (49.43%)      | 118 (57.84%)         |

**Supplementary Table S2. Laboratory findings on hospital admission**

| <b>Laboratory findings</b>             | <b>Reference range</b> | <b>NAFLD</b>        | <b>non-NAFLD</b>    | <b>p-Value</b> |
|----------------------------------------|------------------------|---------------------|---------------------|----------------|
| C-reactive protein, mg/L               | < 5                    | 206 (118-291)       | 198 (88-280)        | 0.4614         |
| Procalcitonin, µg/L                    | < 0.05                 | 0.83 (0.24-8.2)     | 0.9 (0.21-5.2)      | 0.4787         |
| Lactate, mmol/L                        | < 2                    | 2 (1.2-3.1)         | 1.9 (1.3-3.1)       | 0.6674         |
| White blood cells, x10 <sup>9</sup> /L | 3.4 – 9.7              | 13 (8.8-16.0)       | 13 (9-18)           | 0.4939         |
| ANC, x10 <sup>9</sup> /L               | 2.06 – 6.49            | 10 (6.5-16.0)       | 9.7 (6.4-14.0)      | 0.4128         |
| ALC, x10 <sup>9</sup> /L               | 1.19 – 3.35            | 0.84 (0.51-1.2)     | 0.78 (0.46-1.5)     | 0.7017         |
| Ne/Ly ratio                            | 1-3                    | 12 (6.5-26.0)       | 12 (5.4-24.0)       | 0.5699         |
| Hemoglobin, g/L                        | 138 -175               | 127 (113-137)       | 122 (105-133)       | 0.0137         |
| Hematocrit                             | 0.356 – 0.470          | 0.38 (0.34-0.41)    | 0.36 (0.32-0.4)     | 0.0202         |
| MCV                                    | 83.0 – 97.2            | 89 (84-92)          | 88 (85-91)          | 0.7432         |
| Platelets, x10 <sup>9</sup> /L         | 158 - 424              | 210 (153-269)       | 216 (159-285)       | 0.5032         |
| Plt/Ly ratio                           | 90 - 210               | 240 (164-401)       | 232 (144-375)       | 0.4232         |
| Fibrinogen, g/L                        | 1.8 – 3.5              | 6 (4.9-7.9)         | 5.9 (4.9-8.1)       | 0.8013         |
| International normalized ratio (INR)   | 0.8–1.2                | 1.1 (0.97-1.2)      | 1.1 (0.97-1.2)      | 0.9493         |
| D-dimer, mg/L                          | <0.50                  | 2 (1-4.2)           | 1.7 (1-4.2)         | 0.3881         |
| Glucose, mmol/L                        | 4.4 – 6.4              | 7.6 (6.5-9.8)       | 6.7 (5.8-8.1)       | <0.0001        |
| Blood urea nitrogen, mmol/L            | 2.8 – 8.3              | 8 (5.2-12)          | 6.7 (5.1-11)        | 0.1904         |
| Creatinine, µmol/L                     | 64 – 104               | 93 (71-146)         | 84 (63-118)         | 0.0429         |
| eGFR (MDRD)                            | >90                    | 64 (36-86)          | 69 (45-94)          | 0.0314         |
| Na, mmol/L                             | 137 - 146              | 139 (135-141)       | 138 (136-142)       | 0.8687         |
| Potassium, mmol/L                      | 3.9 – 5.1              | 3.8 (3.5-4.3)       | 3.9 (3.6-4.2)       | 0.2416         |
| Total bilirubin, µmol/L                | 3 -20                  | 12 (8-18)           | 12 (7.7-17)         | 0.3111         |
| Aspartate aminotransferase, U/L        | 8 – 38                 | 33 (23-60)          | 26 (18-48)          | 0.0002         |
| Alanine aminotransferase, U/L          | 10 – 48                | 33 (19-55)          | 24 (15-45)          | 0.0069         |
| Gamma-glutamyl transferase, U/L        | 11 – 55                | 54 (29-116)         | 34 (20-67)          | <0.0001        |
| Alkaline phosphatase, U/L              | 60 - 142               | 76 (60-103)         | 80 (63-102)         | 0.4812         |
| Lactate dehydrogenase, U/L             | <241                   | 204 (176-274)       | 198 (161-262)       | 0.1101         |
| Troponin T, ng/L                       | < 14                   | 0.029 (0.015-0.064) | 0.024 (0.012-0.053) | 0.2234         |
| Total serum proteins, g/L              | 66 – 81                | 61 (56-67)          | 61 (56-67)          | 0.9688         |
| Serum albumins, g/L                    | 41 – 51                | 32 (29-37)          | 32 (28-38)          | 0.8048         |
| Triglycerides, mmol/l                  | <1.7                   | 1.9 (1.4-2.9)       | 1.4 (1.1-2)         | <0.0001        |
| Cholesterol, mmol/L                    | < 5.0                  | 3.9 (3.2-4.8)       | 3.8 (2.9-4.7)       | 0.3802         |
| LDL, mmol/L                            | < 3,0                  | 2.4 (1.9-3.1)       | 2.3 (1.6-2.9)       | 0.2125         |
| HDL, mmol/L                            | >1.0                   | 0.7 (0.6-0.9)       | 0.8 (0.6-1)         | 0.1167         |
| <b>Liver related scores</b>            |                        |                     |                     |                |
| FAST score                             |                        | 0.31 (0.15-0.52)    | 0.1 (0.04-0.27)     | <0.0001        |
| FAST score >0.35                       |                        | 77 (44.25%)         | 39 (19.12%)         | <0.0001        |
| APRI score                             |                        | 0.46 (0.23-1.1)     | 0.36 (0.22-0.73)    | 0.0429         |
| FIB-4 score                            |                        | 2.1 (1.2-3.4)       | 1.6 (0.91-2.7)      | 0.0056         |
| NAFLD score                            |                        | 0.43 (-0.62-2.1)    | -0.48 (-1.9-1.1)    | <0.0001        |
| NAFLD score (<1.4)                     |                        | 23 (13.22%)         | 63 (30.88%)         | 0.0002         |

**Supplementary Table S3. The differences in baseline clinical, laboratory and microbiological characteristics between survivors and non-survivors**

|                                         | <b>Non-survivors</b> | <b>Survivors</b> | <b>p-Value</b> |
|-----------------------------------------|----------------------|------------------|----------------|
| Age, years, median (IQR)                | 69 (55-79)           | 67 (54-78)       | 0.4871         |
| Male sex, n (%)                         | 24 (46.15%)          | 163 (49.85%)     | 0.6563         |
| Body mass index, kg/m <sup>2</sup>      | 27 (25-30)           | 27 (24-31)       | 0.3563         |
| Waist-hip ratio                         | 1 (0.93-1)           | 0.96 (0.9-1)     | 0.1594         |
| Waist-height ratio                      | 1.8 (1.7-2.1)        | 1.9 (1.7-2.1)    | 0.9092         |
| Controlled Attenuation Parameter (dB/m) | 270 (224-300)        | 239 (196-293)    | 0.0107         |
| Liver stiffness (kPa)                   | 6.6 (5.1-8.7)        | 5.7 (4.1-8.2)    | 0.037          |
| Smoker                                  | 8 (15.38%)           | 67 (20.49%)      | 0.4577         |
| Moderate alcohol consumption            | 4 (7.69%)            | 37 (11.31%)      | 0.6302         |
| Charlson comorbidity index              | 3.5 (2-6.8)          | 3 (2-5)          | 0.099          |
| <b>Comorbidities, n (%)</b>             |                      |                  |                |
| NAFLD                                   | 32 (65.54%)          | 142 (43.43%)     | 0.0167         |
| Diabetes mellitus type 2                | 21 (40.38%)          | 71 (21.71%)      | 0.0052         |
| Arterial hypertension                   | 33 (63.46%)          | 183 (55.96%)     | 0.3364         |
| Dyslipidemia                            | 15 (28.85%)          | 75 (22.94%)      | 0.381          |
| Chronic obstructive pulmonary disease   | 5 (9.62%)            | 25 (7.65%)       | 0.5838         |
| Gastritis / GERD                        | 7 (13.46%)           | 30 (9.17%)       | 0.319          |
| Cardiovascular diseases                 | 13 (25.00%)          | 81 (24.77%)      | >0.9999        |
| Chronic renal insufficiency             | 5 (9.62%)            | 17 (5.20%)       | 0.2041         |
| Peripheral vascular disease             | 3 (5.77%)            | 20 (6.12%)       | >0.9999        |
| Neurological diseases                   | 12 (23.08%)          | 59 (18.04%)      | 0.4433         |
| Metabolic syndrome                      | 20 (38.46%)          | 137 (41.90%)     | 0.7621         |
| MetS median score                       | 2 (1-3)              | 2 (1-3)          | 0.17           |
| <b>Sepsis severity scores</b>           |                      |                  |                |
| SOFA                                    | 5 (4-7)              | 2 (1-4)          | <0.0001        |
| APACHE II                               | 18 (10-24)           | 12 (8-18)        | 0.0006         |
| <b>Liver related scores</b>             |                      |                  |                |
| FAST score                              | 0.37 (0.23-0.62)     | 0.19 (0.06-0.39) | <0.0001        |
| FIB-4 score                             | 3 (1.5-6.8)          | 1.7 (1.1-2.9)    | <0.0001        |
| NAFLD score                             | 1.3 (-0.08-3.3)      | -0.05 (-1.2-1.3) | 0.0003         |
| <b>Infection source</b>                 |                      |                  |                |
| Pneumonia                               | 19 (36.54%)          | 68 (20.80%)      | 0.0082         |
| Skin and soft tissue                    | 4 (7.69%)            | 49 (14.98%)      |                |
| Gastrointestinal tract                  | 9 (17.31%)           | 47 (14.37%)      |                |
| Urinary tract infection                 | 1 (1.92%)            | 70 (21.41%)      |                |
| Other                                   | 15 (26.92%)          | 62 (18.96%)      |                |
| Unknown                                 | 5 (9.62%)            | 31 (9.48%)       |                |
| <b>Laboratory findings on admission</b> |                      |                  |                |
| C-reactive protein, mg/L                | 203 (134-305)        | 197 (86-280)     | 0.3003         |
| Procalcitonin, µg/L                     | 3.3 (0.31-50)        | 0.73 (0.22-4.2)  | 0.007          |
| Lactate, mmol/L                         | 2.6 (1.9-4.2)        | 1.9 (1.1-3)      | 0.0003         |
| White blood cells, x10 <sup>9</sup> /L  | 12 (7.8-15)          | 13 (8.9-17)      | 0.3829         |
| ANC                                     | 9.9 (6.9-13)         | 10 (6.4-15)      | 0.951          |
| ALC                                     | 0.67 (0.31-1.1)      | 0.85 (0.53-1.3)  | 0.0318         |
| Ne/Ly ratio                             | 15 (6.6-35)          | 12 (6-24)        | 0.1162         |

|                                      |                 |                  |         |
|--------------------------------------|-----------------|------------------|---------|
| Hemoglobin, g/L                      | 125 (101-136)   | 125 (108-136)    | 0.3704  |
| Hematocrit, L/L                      | 0.37 (0.3-0.41) | 0.38 (0.33-0.41) | 0.3662  |
| Platelets, x10 <sup>9</sup> /L       | 191 (130-263)   | 214 (160-282)    | 0.0861  |
| Plt/Ly ratio                         | 245 (144-543)   | 232 (160-368)    | 0.2698  |
| Fibrinogen, g/L                      | 5.7 (4.6-7)     | 6 (4.9-8.1)      | 0.1135  |
| International normalized ratio (INR) | 1.3 (1.1-1.7)   | 1 (0.96-1.2)     | <0.0001 |
| D-dimer, mg/L                        | 4.2 (2.7-4.3)   | 1.8 (0.93-3.6)   | <0.0001 |
| Glucose, mmol/L                      | 8.5 (6.4-11)    | 7.1 (6-8.7)      | 0.0515  |
| Blood urea nitrogen, mmol/L          | 9.3 (7.2-15)    | 7 (5.1-11)       | 0.0027  |
| Creatinine, µmol/L                   | 116 (72-201)    | 85 (66-118)      | 0.0108  |
| eGFR (MDRD)                          | 52 (27-78)      | 68 (45-92)       | 0.0038  |
| Total bilirubin, µmol/L              | 15 (11-24)      | 12 (7.9-17)      | 0.0019  |
| Aspartate aminotransferase, U/L      | 41 (25-142)     | 27 (19-51)       | 0.0008  |
| Alanine aminotransferase, U/L        | 35 (14-79)      | 27 (16-47)       | 0.3546  |
| Gamma-glutamyl transferase, U/L      | 46 (22-97)      | 39 (22-79)       | 0.4206  |
| Lactate dehydrogenase, U/L           | 268 (182-442)   | 197 (167-251)    | 0.0008  |
| Serum albumins, g/L                  | 30 (22-33)      | 33 (29-37)       | <0.0001 |
| Triglycerides, mmol/l                | 2.2 (1.4-2.9)   | 1.7 (1.2-2.2)    | 0.0856  |
| Cholesterol, mmol/L                  | 2.8 (2-3.7)     | 3.9 (3.2-4.8)    | 0.0002  |
| LDL, mmol/L                          | 1.7 (1.4-2.5)   | 2.4 (1.9-3.1)    | 0.003   |
| HDL, mmol/L                          | 0.6 (0.4-0.8)   | 0.8 (0.7-1)      | 0.0016  |
| <b>Positive blood cultures</b>       | 20 (36.84%)     | 84 (25.69%)      | 0.0627  |
| <b>Clinical course and treatment</b> |                 |                  |         |
| ICU admission                        | 43 (82.69%)     | 83 (25.38%)      | <0.0001 |
| Vasopressors need                    | 45 (86.54%)     | 55 (16.82%)      | <0.0001 |
| Moderate/severe ARDS                 | 29 (55.77%)     | 43 (13.15%)      | <0.0001 |
| Invasive mechanical ventilation      | 39 (75.00%)     | 49 (14.98%)      | <0.0001 |
| Acute kidney injury                  | 32 (61.54%)     | 49 (14.98%)      | <0.0001 |
| Continuous renal replacement therapy | 29 (55.77%)     | 17 (5.20%)       | <0.0001 |
| Nosocomial infections                | 17 (32.69%)     | 27 (8.26%)       | <0.0001 |
